# Supplementary material
Source: PubMed Central journal article supplement (PMC3970554)
Supplement: NIHMS564576-supplement-01.pdf [file NIHMS564576-supplement-01.pdf]

**Supplemental Table 1. ICD-9 codes used to define comorbid conditions**

| <b>Comorbid condition</b>                           | <b>ICD9 Diagnosis Code(s)</b>                                                                        |
|-----------------------------------------------------|------------------------------------------------------------------------------------------------------|
| <b>Esophageal reflux, gastrointestinal ulcer</b>    | 530.1x, 530.2x, 530.81, 530.85, 531.xx-535.xx                                                        |
| <b>Rheumatoid arthritis</b>                         | 714.xx, 716.50-716.99, 719.3x, 720.xx                                                                |
| <b>Asthma</b>                                       | 491.xx-493.xx                                                                                        |
| <b>Cough</b>                                        | 786.2x                                                                                               |
| <b>Congestive heart failure</b>                     | 398.91, 402.01, 402.11, 402.91, 404.01, 404.03, 404.11, 404.13, 404.91, 404.93, 425.x, 428.x, 674.5x |
| <b>Obesity</b>                                      | 278.00, 278.01                                                                                       |
| <b>Smoking</b>                                      | 305.1, V15.82, 989.84                                                                                |
| <b>Alcohol abuse</b>                                | 291.xx, 303.xx, 305.00-305.02, 571.1, 790.3,                                                         |
| <b>Dementia</b>                                     | 290.xx, 294.1x, 331.0, 331.1x, 331.2, 331.7, 331.82, 331.89, 331.9                                   |
| <b>Gait disturbance or history of falls</b>         | 781.2, V158.8                                                                                        |
| <b>Coronary artery disease</b>                      | 410.xx-414.0x, 414.2-414.9, 429.7x, 996.03 and procedure code 36.x                                   |
| <b>Cerebral vascular disease</b>                    | 430.xx-436.xx, 437.0, 437.1, 437.8, 437.9, 438.xx                                                    |
| <b>Peripheral vascular disease</b>                  | 440.2x-440.9, 443.89, 443.9, 444.xx, 445.xx                                                          |
| <b>Intestinal malabsorption</b>                     | 579.x                                                                                                |
| <b>Chronic renal insufficiency</b>                  | 250.4x, 285.21, 403.xx-404.xx, 581.xx, 584.xx-586, 588.x, 593.9, V56.x, V45.1x                       |
| <b>Endocrine disorder affecting bone metabolism</b> | 252.xx, 253.2, 255.0, 255.4x, 255.5, 268.xx, 275.3, 275.4x, 275.5, 731.0                             |
| <b>Immune deficiency</b>                            | 279.0x-279.3, 279.8, 279.9                                                                           |
| <b>Inflammatory bowel disease</b>                   | 555.xx-556.xx                                                                                        |
| <b>Osteoporosis</b>                                 | 733.00-733.19                                                                                        |
| <b>Seizures or a history of syncope</b>             | 345.00-345.5x, 345.7x-345.9x, 780.2, 780.39                                                          |
| <b>Chronic liver disease</b>                        | 571.2, 571.4x-571.9, 572.2-572.8, 573.x                                                              |
| <b>Chronic pancreatitis</b>                         | 577.1, 579.4                                                                                         |
| <b>Diabetes</b>                                     | 249.xx, 250.xx                                                                                       |
